1           **Temperature-mediated inhibition of a**  
2 **bumble bee parasite by an intestinal**  
3 **symbiont**  
4

5           Running title: Temperature-mediated parasite inhibition

6

7           Evan C Palmer-Young <sup>1\*</sup>, Thomas R Raffel <sup>2</sup>, Quinn S McFrederick <sup>1</sup>

8

9           <sup>1</sup> Department of Entomology, University of California Riverside, Riverside, CA, USA

10          <sup>2</sup> Department of Biology, Oakland University, Rochester, MI, USA

11          \*Corresponding author: [ecp52@cornell.edu](mailto:ecp52@cornell.edu)

12

13

## 14 **ABSTRACT**

15           Competition between organisms is often mediated by environmental factors including  
16 temperature. In animal intestines, nonpathogenic symbionts compete physically and chemically against  
17 pathogens, with consequences for host infection. We used metabolic theory-based models to  
18 characterize differential responses to temperature of a bacterial symbiont and a co-occurring  
19 trypanosomatid parasite of bumble bees, which regulate body temperature during flight and incubation.  
20 We hypothesized that inhibition of parasites by bacterial symbionts would increase with temperature,  
21 due to symbionts having higher optimal growth temperatures than parasites.

22           We found that a temperature increase over the range measured in bumble bee colonies would  
23 favor symbionts over parasites. As predicted by our hypothesis, symbionts reduced the optimal growth  
24 temperature for parasites, both in direct competition and when parasites were exposed to symbiont  
25 spent medium. Inhibitory effects of the symbiont increased with temperature, reflecting accelerated  
26 growth and acid production by symbionts. Our results indicate that high temperatures, whether due to  
27 host endothermy or environmental factors, can enhance the inhibitory effects of symbionts on  
28 parasites. Temperature-modulated manipulation of microbiota could be one explanation for fever- and  
29 heat-induced reductions of infection in animals, with consequences for diseases of medical and  
30 conservation concern.

31           **Key words:** thermal performance asymmetry, temperature-mediated competition, gut  
32 microbiome, *Bombus*, *Crithidia*, *Lactobacillus bombicola*

## 33 **INTRODUCTION**

34           Temperature governs rates of the chemical interactions that underlie life, growth, and  
35 reproduction, shaping biological processes from the level of the enzyme to the ecosystem [1]. One area  
36 of biology where temperature has demonstrated effects is on species interactions such as parasitism,  
37 where temperature can have profound effects on infection outcomes and transmission[2,3]. High host  
38 body temperatures have been shown to reduce infection intensity and infection-related mortality in  
39 both plants and animals [4–6], and metabolic and behavioral fevers are common responses to infection  
40 in vertebrates and insects [4,7,8].

41           Another factor that can influence infection outcome is the host-associated microbiota. The  
42 microbiota of the skin and gut constitute barriers to infection that can physically and chemically  
43 interfere with pathogen invasion, as well as modify host immune responses [9]. Because microbial taxa  
44 can differ widely in their optimal growth temperatures, alterations in temperature can affect the relative  
45 competitive abilities of co-occurring species [10]. These differential responses of interacting species to  
46 temperature, referred to variously as “asymmetries” or “mismatches” between the two species' thermal  
47 performance curves [11,12], can affect inhibitory interactions between symbionts and parasites [13].  
48 This could have important consequences for the temperature dependence of infection. However, few  
49 studies have considered the effects of elevated temperature on symbiotic microbiota [14,15], and the  
50 consequences of elevated temperature for gut parasite-symbiont competition remain unexplored.

51           Social bees present an ideal system in which to study effects of temperature on competition  
52 between symbionts and parasites. Both honey bees and bumble bees can be infected by a variety of  
53 parasites and pathogens, transmission of which is facilitated by the high density of hosts in colonies [16].  
54 However, honey bees and especially bumble bees are facultative endotherms that possess a remarkable  
55 ability to regulate their temperatures at the level of the individual bee and colony at over 30 °C above

56 ambient temperature [17,18]. This thermoregulatory capacity allows bumble bees to maintain the  
57 temperatures necessary for flight and brood development during times of year when other insects are  
58 inactive [19]. The elevated temperatures of bees facilitate not only foraging and colony development,  
59 but also defense against infection. In honey bees, high temperatures decreased infection with  
60 *Ascosphaera apis* [20], Deformed Wing Virus [21], *Varroa* mites [22], *Nosema apis*, and *N. ceranae* [23].

61 In addition to their own parasite resistance mechanisms (including thermoregulation), honey  
62 and bumble bees have a well-characterized microbiota with demonstrated benefits against infection in  
63 larvae and adults [24]. The core gut microbiota consists of five main clades that are found in corbiculate  
64 (“pollen-basket”) bees throughout the world [25]. The bumble bee microbiota is dominated by just  
65 three of these five core taxa—*Snodgrassella*, *Gilliamella*, and *Lactobacillus* Firmicutes-5 (“Firm-5”)—  
66 which together often account for over 80% of the total gut microbiota of worker bumble bees [26–28].  
67 Bacteria isolated from the bumble bee gut had direct inhibitory activity against several bee pathogens  
68 [29], and microbiota rich in *Gilliamella* and *Lactobacillus* Firm-5 have been negatively correlated with  
69 trypanosomatid infection in bumble bees [26,28,30].

70 All of the core bumble bee gut symbionts have optimal growth temperatures at 35-37 °C  
71 [31,32]. In contrast, widespread trypanosomatid and microsporidian gut parasites (*Crithidia*, *Lotmaria*,  
72 and *Nosema* spp.), were described as having optimal temperatures of 25-27 °C [33–35]. This difference  
73 in observed *in vitro* growth temperatures suggests the hypothesis that temperatures above the  
74 parasites’ thermal optima will favor core symbionts over gut pathogens, due to increased asymmetry in  
75 symbiont versus pathogen growth rates at these temperatures. However, no study has empirically  
76 quantified differences in the thermal performance curves (i.e., relationship between temperature and  
77 growth rate) for symbionts versus parasites, or the temperature dependence of symbiont-mediated

78 parasite inhibition, both of which are likely to shape the effects of temperature on infection in bumble  
79 bees.

80 We used the *Crithidia bombi* / *Lactobacillus bombicola* system to examine temperature  
81 dependence of bee symbiont-parasite interactions *in vitro*. *Crithidia bombi* is an intestinal  
82 trypanosomatid that is both widespread and abundant in bumble bees [36,37]. This parasite reduces  
83 foraging efficiency and starvation tolerance in worker bees [38,39], growth rates and reproductive  
84 output of colonies [40], and post-hibernation survival and hive-founding in queens [38]. Its introduction  
85 has been correlated with decline of native bumble bees in South America [41], and its relative *Lotmaria*  
86 *passim* (formerly reported as *C. mellificae*) has been correlated with colony collapse in honey bees  
87 [42,43]. *Crithidia bombi* has been cultured at 27 °C [33], and *L. passim* at 25 °C [34]. *Lactobacillus*  
88 *bombicola*, the most widely distributed species found in a cross-species survey of bumble bees [29], is a  
89 member of the *Lactobacillus* Firm-5 clade. This clade is found in honey, bumble, and other corbiculate  
90 bees worldwide [25]. In honey bees, Firm-5 was the clade with the strongest effect on gut metabolomics  
91 [44]. The abundance of Firm-5 bacteria has been negatively correlated with the infection success of *C.*  
92 *bombi* [26,28]. *Lactobacillus bombicola* has been reported to grow at 28-37 °C [45]. Together, these  
93 observations suggest that *L. bombicola* is an important gut symbiont that could inhibit *C. bombi* growth  
94 in a temperature-dependent manner.

95 We measured *in vitro* growth of *C. bombi* and *L. bombicola* grown alone, together, and  
96 sequentially across a range of incubation temperatures. We tested whether:

97 (1) *Crithidia bombi* and *L. bombicola* growth rates have differential responses to temperature,  
98 using metabolic-theory derived models to describe their thermal performance curves,

99 (2) Competitive effects of *L. bombicola* on *C. bombi* increase with temperature and decrease the  
100 temperature of peak parasite growth, as predicted based on asymmetries in symbiont versus parasite  
101 thermal performance curves, and

102 (3) Temperature-dependent chemical alterations to the growth environment made by *L.*  
103 *bombicola* are sufficient to explain temperature-dependent parasite inhibition.

104

## 105 **MATERIALS AND METHODS**

### 106 **Overview of experiments**

107 Three series of experiments were conducted to determine the temperature dependence of  
108 interactions between *C. bombi* and *L. bombicola*. To estimate Thermal Performance Curves, we  
109 measured each species' growth rate across a range of incubation temperatures. To assess temperature  
110 dependence of direct competition, we cocultured *L. bombicola* with *C. bombi* at three incubation  
111 temperatures ("Coculture Experiment"). To assess whether a chemical mechanism could explain the  
112 temperature-dependent inhibition of parasites in coculture, we compared the effects of *L. bombicola*  
113 spent medium from different temperatures on *C. bombi* growth ("Spent Medium Experiment").

114 Each experiment used 6 incubators. Thus, for six-temperature experiments used to generate  
115 thermal performance curves, we had one incubator-level replicate for each repetition of the  
116 experiment. For three-temperature experiments (Coculture and Spent Medium), we had two replicates  
117 per repetition. We chose to use the incubator (rather than the sample) as the unit of replication. This  
118 accounts for the scale at which the temperature treatment was imposed and avoids pseudoreplication  
119 within incubators [3,46]. To increase the number of true replicates of the temperature treatments, we

120 conducted multiple temporal repetitions (blocks) of each experiment, with each incubator assigned to a  
121 different temperature treatment during each repetition.

## 122 Cell Cultures

123 *Crithidia bombi* cell cultures were isolated from bumble bee intestines by flow cytometry-based  
124 single cell sorting [33]. Cultures originated from wild infected bumble bees. Strains C1.1 (Corsica, 2009)  
125 and S08.1 (Switzerland, 2008, both courtesy Ben Sadd) originated from *B. terrestris*. Strains IL13.2  
126 (Illinois, USA, 2013, courtesy Ben Sadd) and VT1 (Vermont, USA, 2013, courtesy Rebecca Irwin)  
127 originated from *B. impatiens*. These same cell lines have been used to assess effects of phytochemicals  
128 on parasite growth [47]. Briefly, cells from fecal samples were sorted into 96-well plates containing  
129 "FPFB" culture medium with 10% heat-inactivated fetal bovine serum and incubated at 27 °C, then  
130 cryopreserved at -80 °C until several weeks before the experiments began [33]. Culture identity was  
131 confirmed as *C. bombi* based on glyceraldehyde 3-phosphate dehydrogenase and cytochrome b gene  
132 sequences. *Lactobacillus bombicola* strain 70-3, isolated from *Bombus lapidarius* collected near Ghent,  
133 Belgium (isolate "28288T" [45]), was obtained from the DSMZ. *Lactobacillus bombicola* was grown in 2  
134 mL screw-cap tubes in MRS broth (Research Products International, Mt. Prospect, IL) with 0.05%  
135 cysteine (hereafter "MRSC") and incubated at 27 °C.

## 136 Thermal performance curves

137 Growth of each species was measured concurrently by optical density (OD 630 nm) at six  
138 temperatures (17-42 °C in 5 °C increments). *Crithidia bombi* cells were added to 96-well plates in 200 µL  
139 culture medium at an initial OD of 0.005 (~800 cells µL<sup>-1</sup>). OD measurements were taken at 24 h intervals  
140 through 120 h of incubation [48]. *Lactobacillus bombicola*, which grew poorly in 96-well plates, was  
141 grown in 2 mL screw-cap tubes. Cells were added at an initial OD of 0.020 and measured after 3, 4, 5, 6,  
142 and 24 h incubation. The entire experiment was repeated 5 (*C. bombi*) or 6 (*L. bombicola*) times, with

143 incubator temperatures switched between each repetition. Net OD was calculated by subtracting the  
144 OD of cell-free medium from the corresponding temperature and time point; this controlled for any  
145 changes in OD that occurred independent of cell growth.

146 We used metabolic theory equations to model the relationship between temperature and  
147 growth rate. Growth rates were calculated by fitting a model-free spline [49] to the curve of log-  
148 transformed OD ( $\ln(\text{OD}_t/\text{OD}_{t_0})$ ) with respect to time [50]. A separate spline was fit to each replicate  
149 combination of incubator, strain, and incubation temperature to estimate the maximum specific growth  
150 rate.

151 Thermal performance curves were modeled for each species and strain using the log-  
152 transformed Sharpe-Schoolfield equation [51,52], with temperature as the predictor variable and  
153  $\ln(\text{maximum specific growth rate})$  as the response variable (Equation 1).

$$154 \quad \ln(\text{rate}) = \ln c + E \left( \frac{1}{T_c} - \frac{1}{kT} \right) - \ln \left( 1 + e^{E_h \left( \frac{1}{kT_h} - \frac{1}{kT} \right)} \right) \quad (1)$$

155 In Equation 1, “rate” is the maximum specific growth rate;  $\ln c$  is the natural log of the growth  
156 rate at an arbitrary calibration temperature;  $E$  is the activation energy, which corresponds to the slope  
157 of the thermal performance curve below the temperature of peak growth;  $T_c$  is the calibration  
158 temperature;  $k$  is Boltzmann’s constant;  $T$  is the incubation temperature;  $E_h$  is the high-temperature  
159 deactivation energy, which corresponds to the rate at which growth decreases at supraoptimal  
160 temperatures; and  $T_h$  is the supraoptimal temperature at which growth rate is reduced by 50% relative  
161 to peak growth rate.

162 Solving Equation 1 for the maximum growth rate yields the temperature of peak growth,  $T_{pk}$   
163 [51]:



164

$$T_{pk} = \frac{E_h T_h}{E_h + kT_h \ln\left(\frac{E_h}{E} - 1\right)}$$

165 The model fit was optimized for each species and strain using non-linear least squares with  
166 package *nls.multstart*, function “nls\_multstart” [53]. Model predictions with uncertainty estimates for  
167  $T_{pk}$  and predicted growth at each temperature were estimated by bootstrap resampling (999 iterations).  
168 For each bootstrap sample, bootstrap model parameters were estimated, and predictions generated  
169 across the full range of incubation temperatures. We constructed 95% bootstrap confidence intervals  
170 around the predictions of the original model using the 0.025 and 0.9725 quantiles of predictions from  
171 the bootstrap model fits.

## 172 Co-culture Experiment

173 To assess temperature dependence of direct competition, we cocultured *L. bombicola* with *C.*  
174 *bombi* strain VT1 at three incubation temperatures (27, 32, and 37 °C). These temperatures were chosen  
175 for two reasons, one statistical and one physiological. Statistically, these temperatures correspond to  
176 the regions of maximal asymmetry in the two species’ thermal performance curves. “Asymmetry”  
177 means that the two species have differently or oppositely sloped performance curves across this  
178 temperature range [12]. Growth rate of *L. bombicola* continues to increase, whereas growth rate of *C.*  
179 *bombi* plateaus and begins to decline. Physiologically, this is a relevant temperature range for bumble  
180 bees. In the hive, thoracic temperatures of workers generally range from 27 to 33 °C (range 23-36 °C),  
181 with brood kept near 30 °C [54]. During nest establishment, queens of *Bombus vosnesenskii* maintained  
182 even higher temperatures (37.4 to 38.8°C, day and night [54]).

183 Coculture experiments were conducted in 2 mL tubes in a mixed medium of 50% *Crithidia*-  
184 specific PFMB and 50% *Lactobacillus*-specific MRSC. The mixed medium supported growth of both  
185 species, whereas neither 100% PFMB (no *L. bombicola* growth) nor 100% MRSC (no *C. bombi* growth) was

186 suitable for coculture. Cells were grown in their preferred treatment media (FPFB for *C. bombi*, MRSC for  
187 *L. bombicola*) until the experiment began. At the start of experiment, cells were diluted by OD to 2x final  
188 concentrations in their respective preferred media, prior to combination in equal volumes to create the  
189 mixed medium. Each experiment included 18 treatments: the three incubation temperatures crossed  
190 with two *C. bombi* start densities (initial OD = 0.010 and cell free control) and three *L. bombicola* start  
191 densities (initial OD = 0.010, 0.020, and cell free control).

192 To initiate the experiment, 500  $\mu$ L each of MRSC-based *L. bombicola* treatment and FPFB-based  
193 *C. bombi* treatment were combined in 2 mL screw-cap tubes. Samples were incubated at the  
194 appropriate temperature, with growth measurements made after 6 and 24 h of incubation. Growth  
195 rates of *L. bombicola* in monoculture were calculated as the rate of increase over the first 6 h  
196 ( $\log(\text{OD}_{6\text{h}}/\text{OD}_{0\text{h}})/6$ ). Growth rates of *C. bombi* in both monoculture and coculture were determined by  
197 hemocytometer cell counts at 200x magnification. Quantification of growth by cell counts, rather than  
198 OD, allowed us to differentiate growth of the larger, morphologically distinct *C. bombi* from that of *L.*  
199 *bombicola*. Starting cell density was estimated based on cell counts from tubes at time 0 h (OD = 0.010),  
200 averaged across all repetitions of the experiment. Final partial OD of *L. bombicola* was approximated by  
201 subtracting the estimated OD due to *C. bombi* from the total net OD, using a best-fit linear relationship  
202 between *C. bombi* cell density and OD. Growth of *L. bombicola* in coculture was approximated by  
203 subtracting the estimated *C. bombi* OD after 6 h of incubation from the total net OD. The calculation  
204 assumed constant, exponential growth of *C. bombi* through 24 h incubation, and the same relationship  
205 between OD and *C. bombi* cell count observed in the time 0 h samples. Growth rates of *L. bombicola* in  
206 coculture should therefore be considered approximate, as we were unable to count individual cells of  
207 this species.

208 Motility of *C. bombi* cells, which are mobile flagellates, was recorded during cell counts. Cell  
209 motility of the sample was recorded on an ordinal scale based on whether cells were rapidly swimming,  
210 twitching, or immotile (motility scores of 2, 1, and 0, respectively). Monocultured cells were generally  
211 the most rapidly moving, and after initial motility screening were diluted in 50% sucrose. The viscosity of  
212 this solution slowed the cells to the point where they were countable.

213 Effects of temperature and *L. bombicola* start density on *C. bombi* growth rate were analyzed by  
214 a general linear mixed model [55] with experiment round as a random effect. F-tests were used to  
215 evaluate the significance of model terms [56], and pairwise comparisons were made with R package  
216 “lsmeans” [57]. Effects of temperature and *L. bombicola* start density on *C. bombi* cell motility were  
217 analyzed by a bias-reduced binomial model [58], to cope with complete separation (i.e., no within-group  
218 variation in motility). Cell motility was considered as a binary response variable (motility > 0). Likelihood  
219 ratio tests were used to evaluate significance of model terms. The relationship between *C. bombi*  
220 growth rate and *L. bombicola* OD after 24 h was tested by linear regression.

## 221 Spent medium experiment

222 We used *L. bombicola* spent medium (i.e., cell-free supernatant of medium in which *L.*  
223 *bombicola* was grown, then removed by filter sterilization) to test whether temperature-dependent  
224 inhibition observed in coculture experiments could be explained by temperature-dependent production  
225 of inhibitory chemicals by the symbiont. In the first stage of the experiment, *L. bombicola* spent medium  
226 was generated at different temperatures. In the second stage, growth of *C. bombi* (strain VT1) was  
227 measured in the presence of 50% spent medium at the same temperature at which the spent medium  
228 was generated (e.g., spent medium from 32 °C was tested for effects on *C. bombi* incubated at 32 °C; see  
229 schematic, Supplementary Figure 1). These experiments used the same three growth temperatures  
230 tested in the Coculture Experiment (27, 32, and 37 °C) crossed with three *L. bombicola* start densities

231 (OD of 0, 0.001, or 0.010), for a total of 9 treatments. Each temperature treatment was replicated in two  
232 different incubators in each repetition of the experiment. The entire experiment was repeated three  
233 times, for a total of six incubator-level replicates.

234 Spent medium was generated in 14 mL screw-cap conical tubes filled with 8 mL MRSC medium.  
235 Each tube was seeded at the appropriate starting density (OD of 0, 0.001, or 0.010) and incubated for 20  
236 h at the appropriate temperature (27, 32, or 37 °C). At the end of the incubation period, a 200 µL aliquot  
237 of the resulting spent medium was removed for measurement of OD. The remainder was sterile-filtered  
238 to yield the MRSC-based spent medium. A 2 mL aliquot of the spent medium was reserved for  
239 measurement of pH; the remainder was used immediately for assays of *C. bombi* growth.

240 Growth of *C. bombi* was measured in 96-well tissue culture plates in 50% MRSC-based spent  
241 medium and 50% *Crithidia*-specific PFPB medium. *Crithidia bombi* cell cultures were diluted to an optical  
242 density of 0.020 in *Crithidia*-specific PFPB medium [33]. The *C. bombi* cell suspension (100 µL) was added  
243 to an equal volume of spent medium for an initial net OD of 0.010, with 12 replicate wells per plate.  
244 Plates were incubated at the same temperature used for generation of the spent medium. Growth was  
245 measured by OD at 20, 26, 44, and 50 h of incubation. Net OD was computed by subtraction of OD from  
246 cell-free control wells of the corresponding spent medium treatment and time point. Visual inspection  
247 of growth curves indicated that maximum growth rate occurred during the initial incubation interval (0-  
248 20 h). Therefore, relative growth rate was computed as

249 
$$r = \frac{\ln\left(\frac{OD_{t_1}}{OD_{t_0}}\right)}{\Delta t} \quad (2)$$

250 Where  $OD_{t_0}$  represents initial OD of *C. bombi* (0.010),  $OD_{t_1}$  represents OD at the time of first  
251 measurement (20 h), and  $\Delta t$  is the amount of time between the start of the experiment and the first  
252 measurement.

253 Effects of temperature and *L. bombicola* start density on *C. bombi* growth rate were analyzed by  
254 a general linear mixed model with experiment round as a random effect [55]. F-tests were used to  
255 evaluate the significance of model terms [56]. Relationships between spent medium OD before filtration  
256 and temperature, spent medium pH and temperature, *C. bombi* growth rate and spent medium OD  
257 before filtration, and *C. bombi* growth rate and spent medium pH were tested by linear regression.

## 258 **RESULTS**

259 **Thermal performance curves showed higher temperatures of peak growth and upper limits of**  
260 **thermotolerance in *L. bombicola* than in *C. bombi* (Fig 1).** All *C. bombi* strains showed similar model-  
261 predicted peak growth temperatures ( $T_{pk}$ ), ranging from 33.9 °C in strain S08.1 to 34.4 °C in strain IL13.2.  
262 These estimates were at least 5 °C lower than the estimated  $T_{pk}$  for *L. bombicola* (39.83 °C, Fig. 1). For all  
263 strains of *C. bombi*, the temperature that inhibited growth by 50% ( $T_h$ ) was below 38 °C, or at least 5 °C  
264 lower than the  $T_h$  for *L. bombicola* (Fig. 1). Full model parameters are given in Supplementary Table S1.

265 **Coculture with *L. bombicola* inhibited *C. bombi* growth and motility, and reduced**  
266 **temperature of peak *C. bombi* growth (Fig. 2).** Growth rate of *C. bombi* was reduced by over 50% in  
267 coculture (temperature-adjusted marginal mean  $0.66 \pm 0.005$  in monoculture vs.  $0.32 \pm 0.005$  in  
268 coculture, Fig. 2A). We found stronger inhibitory effects of *L. bombicola* at higher temperatures  
269 (temperature x *L. bombicola* start density interaction,  $F_{4,43} = 3.30$ ,  $P = 0.019$ ). Competition with *L.*  
270 *bombicola* altered the shape of the *C. bombi* thermal performance curve. Whereas *C. bombi* grew well  
271 throughout the range of 27-37 °C in monoculture, growth was poor above 27 °C in coculture (Fig. 2A). In  
272 addition to reducing growth, coculture with *L. bombicola* profoundly reduced *C. bombi* cell motility in a  
273 temperature-dependent fashion (Temperature x *L. bombicola* interaction: Chi-squared = 16.36, Df = 1,  $P$   
274 < 0.001, Fig. 2B). Whereas cells remained motile regardless of temperature in monoculture, no motility  
275 was observed above 27 °C in coculture. The stronger effects of *L. bombicola* on *C. bombi* at high

276 temperatures reflected increased *L. bombicola* cell densities, which were negatively correlated with *C.*  
277 *bombi* growth rate (estimate =  $-0.094 \pm 0.013$  SE,  $t = -7.52$ ,  $P < 0.001$ ,  $R^2 = 0.521$ ).

278 Whereas *L. bombicola* had negative effects on *C. bombi*, *C. bombi* appeared to increase growth  
279 rate of *L. bombicola* under the conditions of our experiments. Estimated *L. bombicola* growth rate was  
280 nearly 3-fold higher in the presence of *C. bombi* than in its absence (temperature-adjusted mean growth  
281 rate =  $0.515 \pm 0.008$  SE with *C. bombi* vs.  $0.181 \pm 0.008$  SE without *C. bombi*,  $t = 29.8$ ,  $P < 0.001$ ,  
282 Supplementary Figure 2).

283 ***Lactobacillus bombicola* spent medium reduced *C. bombi* growth rate and peak growth**  
284 **temperature (Fig. 3).** As in the Coculture Experiment, we found temperature-dependent inhibition of *C.*  
285 *bombi* by *L. bombicola* in the Spent Medium Experiment. Whereas *C. bombi* grew well at all  
286 temperatures in control medium, growth was decreased at high temperatures in the presence of *L.*  
287 *bombicola* spent medium produced at high temperatures (Temperature x *L. bombicola* start density  
288 interaction:  $F_{4, 43} = 8.28$ ,  $P < 0.001$ , Fig. 3A). The stronger inhibitory effects of spent medium from higher  
289 temperatures reflected faster growth of *L. bombicola* at higher temperatures, which led to greater OD ( $t$   
290 =  $3.56$ ,  $P < 0.001$ ) and lower pH ( $t = -3.84$ ,  $P < 0.001$ ) achieved at higher temperatures during generation  
291 of the spent medium. As in the Coculture Experiment, *C. bombi* growth rate was negatively correlated  
292 with final OD of *L. bombicola* (estimate =  $-0.083 \pm 0.017$  SE,  $t = -4.79$ ,  $P < 0.001$ ,  $R^2 = 0.29$ , Fig. 3B), and  
293 even more strongly negatively correlated with acidity of spent medium (effect of pH: estimate =  $10.72 \pm$   
294  $1.64$ ,  $t = 6.54$ ,  $P < 0.001$ ,  $R^2 = 0.44$ , Fig. 3C).

295

## 296 **DISCUSSION**

297 As expected based on temperatures conventionally used in cell cultures, the symbiont *L.*  
298 *bombicola* had higher temperatures of peak growth and grew at higher temperatures than those  
299 tolerated by the parasite *C. bombi*. All four tested parasite strains exhibited similar thermal performance  
300 curves and inhibitory temperatures. This was somewhat surprising given the documented among-strain  
301 variation in growth rate [59], infectivity [60], and ability to tolerate desiccation [61], phytochemicals  
302 [48], antimicrobial peptides [62], and gut microbiota [26]. The conservation of thermal performance  
303 profiles across strains could reflect strong stabilizing selection for enzymes and metabolic processes  
304 involved in thermotolerance, or adaptation to a consistent range of temperatures experienced in the  
305 bee abdomen. Regardless of the physiological underpinning, consistent upper limits of thermotolerance  
306 across parasite strains suggest that elevated temperature would be an effective defense against a range  
307 of *C. bombi* parasite genotypes.

308 The differently shaped thermal performance curves of *L. bombicola* and *C. bombi* indicate that a  
309 temperature increase over the range recorded in bumble bees would favor growth of symbionts over  
310 parasites, while the inhibitory effects of *L. bombicola* on *C. bombi* indicate that this increased symbiont  
311 growth could constrain the ability of parasites to persist at high temperatures. Growth rates of *C. bombi*  
312 plateaued over the 27-33 °C range found in bumble bee nests [54], and began to drop at the 38 °C  
313 temperatures found in post-hibernation queens [54], the life stage at which bumble bees are most  
314 vulnerable to the effects of *C. bombi* [38]. In contrast, growth rate of *L. bombicola* continued to increase  
315 throughout this interval, rising nearly three-fold from 0.265 h<sup>-1</sup> at 27 °C to 0.734 h<sup>-1</sup> at 37 °C. As a result,  
316 any effects of *L. bombicola* on *C. bombi* should become more pronounced at higher temperatures.

317 Within the gut, interactions between species may be positive, negative, or neutral. For example,  
318 the bee gut symbionts *Snodgrassella* and *Gilliamella* facilitate one another's growth physically, via

319 formation of multi-species biofilms [63], and chemically, via cross-feeding and modification of gut  
320 oxygen concentration and pH [44,64]. The effects of *L. bombicola* on *C. bombi* were strongly inhibitory.  
321 We have shown this inhibition to be chemically mediated by *L. bombicola*'s production of acids [65].  
322 Because *L. bombicola* rates of growth and acid production increased over the temperature range found  
323 in bees, we predict that increases in bee body temperature would reduce infection by increasing growth  
324 rate of *L. bombicola* and related Firm-5 bacteria, thereby decreasing gut pH to the point where parasites  
325 cannot grow. Thus, although parasites in monoculture are capable of growth throughout the range of  
326 temperatures found in bees, our results predict that competitive exclusion by symbionts could limit the  
327 parasite's thermal niche to cooler temperatures.

328 In contrast to the inhibitory effects of *L. bombicola* on *C. bombi*, *C. bombi* appeared to facilitate  
329 growth of *L. bombicola*. Given that *L. bombicola* did not grow at all in full-strength FPFB medium, this  
330 facilitation could reflect *C. bombi*'s catabolism of *L. bombicola*-inhibitory components, such as serum, in  
331 the mixed MRSC/FPFB growth medium. Still, our findings indicate highly asymmetric competition  
332 between these two species, to the advantage of the symbiont.

333 The equilibrium outcome of competitive interactions depends on both interaction strengths and  
334 initial densities [66]. In the case of *L. bombicola* and *C. bombi*, initial symbiont densities had the  
335 strongest effects at intermediate temperatures typical of a bumble bee hive (27-33 °C). At these  
336 moderate temperatures, lower symbiont and higher parasite growth rates might allow parasites to  
337 establish if initial symbiont densities are low. In contrast, at higher temperatures typical of those found  
338 in queens (>37 °C), high symbiont growth rates and direct high-temperature inhibition of parasites  
339 quickly made up for low initial symbiont density. In the social *Bombus* and *Apis* bees, core symbionts  
340 such as *Lactobacillus* Firm-5 are rapidly acquired by newly emerged bees from nestmates and hive  
341 materials [27,67]. This socially mediated inoculation with core symbionts can establish a protective



342 barrier against infection in colonies with microbiota that contain acid-producing *Gilliamella* and  
343 *Lactobacillus Firm-5* [26,28]. However, symbiont-based defenses might be weakened by treatment with  
344 antibiotics, which reduced populations of core gut symbionts and resistance to *C. bombi* [68]. Symbiont-  
345 based defenses might also be relatively weak in solitary bees, which can be infected by the same  
346 trypanosomatids that infect honey and bumble bees [34]. These bees lack a thermoregulated nest  
347 environment and a socially transmitted core gut microbiota, instead acquiring acidophilic gut symbionts  
348 from their environment [69]. As a result, solitary bees might be vulnerable to trypanosomatid infection  
349 during maturation of their gut microbiota, especially at cooler temperatures. However, no study has  
350 experimentally investigated trypanosomatid infections in solitary bee species, let alone the temperature  
351 dependence of such infection.

352         In our *in vitro* host-parasite-symbiont system, we found that high temperatures favored  
353 symbionts over pathogens. This suggests that infection-related increases in body temperature, such as  
354 fever, may allow hosts to clear pathogens while sparing beneficial symbionts. However, maintenance of  
355 elevated temperature comes at an energetic cost in both endothermic mammals and insects such as  
356 bumble bees [17,54]. In bees and other endothermic hosts, the ability to maintain parasite-inhibiting  
357 temperature will depend on sufficient caloric resources. Further study of temperature-dependent  
358 changes to microbiota and infection in live bees, and the effects of infection on endogenous  
359 thermoregulation and temperature preference, will be necessary to determine how our *in vitro* findings  
360 scale up to the organismal scale.

361         Studies of other host-symbiont-parasite systems are needed to determine whether high  
362 temperatures achieved during febrile states can be detrimental to symbiont populations [14], whether  
363 directly or via upregulation of host immunity [8,70], and the consequences of these effects for infection  
364 and host health. For example, short-term heat exposure altered soil microbial communities, and caused

365 loss of the soil's activity against plant diseases [71]. Numerous examples demonstrate that depletion of  
366 symbionts increases susceptibility to infection in animals as well [68,72–74]. Amidst growing  
367 appreciation for the roles of temperature, fever, and the microbiome in infectious disease,  
368 understanding the effects of temperature on microbiota-parasite interactions may help to predict  
369 infection outcome in animals that exhibit fever, and in ectotherms that face infection in changing  
370 climates.

## 371 **ACKNOWLEDGMENTS**

372 The authors thank Ben Sadd for providing strains C1.1, IL13.2 and S08.1, Rebecca Irwin for  
373 providing the bees from which Strain VT1 was established, the DSMZ for providing *L. bombicola*, Guang  
374 Xu and Ben Sadd for sharing DNA sequences, and Daniel Padfield for sharing R script.

## 375 **FUNDING**

376 This project was funded by a National Science Foundation Postdoctoral Research Fellowship to  
377 EPY (NSF-DBI-1708945); USDA NIFA Hatch funds (CA-R-ENT-5109-H), NIH (5R01GM122060-02), and NSF  
378 MSB-ECA (1638728) to QSM; and an NSF-CAREER grant (IOS 1651888) to TRR. The funders had no role in  
379 study design, data collection and interpretation, or the decision to submit the work for publication.

380

## 381 **CONFLICTS OF INTEREST**

382 The authors declare that they have no conflicts of interest.

## 383 **DATA AVAILABILITY**

384 All data are supplied in the Supplementary Information, Data S1.

## 385 **AUTHORS' CONTRIBUTIONS**

386 ECPY and QSM conceived the study. ECPY designed and conducted the experiments and  
387 analyzed the data with guidance from TRR and QSM. ECPY drafted the manuscript. All authors revised  
388 the manuscript and gave final approval for publication.

## 389 **REFERENCES**

- 390 1. Brown JH, Gillooly JF, Allen AP, Savage VM, West GB. 2004 Toward a Metabolic Theory of Ecology.  
391 *Ecology* **85**, 1771–1789. (doi:10.1890/03-9000)
- 392 2. Raffel TR, Romansic JM, Halstead NT, McMahon TA, Venesky MD, Rohr JR. 2013 Disease and  
393 thermal acclimation in a more variable and unpredictable climate. *Nat. Clim. Change* **3**, 146–151.  
394 (doi:10.1038/nclimate1659)
- 395 3. Molnár PK, Sckrabulis JP, Altman KA, Raffel TR. 2017 Thermal Performance Curves and the  
396 Metabolic Theory of Ecology—A Practical Guide to Models and Experiments for Parasitologists. *J.*  
397 *Parasitol.* **103**, 423–439. (doi:10.1645/16-148)
- 398 4. Boorstein SM, Ewald PW. 1987 Costs and benefits of behavioral fever in *Melanoplus sanguinipes*  
399 infected by *Nosema acridophagus*. *Physiol. Zool.* **60**, 586–595.
- 400 5. Wood GA. 1973 Application of heat therapy for the elimination of viruses from pip and stone fruit  
401 trees in New Zealand. *N. Z. J. Agric. Res.* **16**, 255–262. (doi:10.1080/00288233.1973.10421144)
- 402 6. Kluger MJ, Kozak W, Conn CA, Leon LR, Soszynski D. 1998 Role of Fever in Disease. *Ann. N. Y. Acad.*  
403 *Sci.* **856**, 224–233. (doi:10.1111/j.1749-6632.1998.tb08329.x)
- 404 7. Kluger MJ, Vaughn LK. 1978 Fever and survival in rabbits infected with *Pasteurella multocida*. *J.*  
405 *Physiol.* **282**, 243–251.
- 406 8. Boltaña S *et al.* 2013 Behavioural fever is a synergic signal amplifying the innate immune response.  
407 *Proc R Soc B* **280**, 20131381. (doi:10.1098/rspb.2013.1381)
- 408 9. Bäumlér AJ, Sperandio V. 2016 Interactions between the microbiota and pathogenic bacteria in the  
409 gut. *Nature* **535**, 85–93. (doi:10.1038/nature18849)
- 410 10. Bestion E, García-Carreras B, Schaum C-E, Pawar S, Yvon-Durocher G, Cameron D. 2018 Metabolic  
411 traits predict the effects of warming on phytoplankton competition. *Ecol. Lett.* **21**, 655–664.  
412 (doi:10.1111/ele.12932)
- 413 11. Cohen JM, Venesky MD, Sauer EL, Civitello DJ, McMahon TA, Roznik EA, Rohr JR. 2017 The thermal  
414 mismatch hypothesis explains host susceptibility to an emerging infectious disease. *Ecol. Lett.* **20**,  
415 184–193. (doi:10.1111/ele.12720)

- 416 12. Dell AI, Pawar S, Savage VM. 2014 Temperature dependence of trophic interactions are driven by  
417 asymmetry of species responses and foraging strategy. *J. Anim. Ecol.* **83**, 70–84. (doi:10.1111/1365-  
418 2656.12081)
- 419 13. Daskin JH, Bell SC, Schwarzkopf L, Alford RA. 2014 Cool Temperatures Reduce Antifungal Activity of  
420 Symbiotic Bacteria of Threatened Amphibians – Implications for Disease Management and Patterns  
421 of Decline. *PLOS ONE* **9**, e100378. (doi:10.1371/journal.pone.0100378)
- 422 14. Kikuchi Y, Tada A, Musolin DL, Hari N, Hosokawa T, Fujisaki K, Fukatsu T. 2016 Collapse of insect gut  
423 symbiosis under simulated climate change. *mBio* **7**, e01578-16. (doi:10.1128/mBio.01578-16)
- 424 15. Parkinson JF, Gobin B, Hughes WOH. 2014 Short-term heat stress results in diminution of bacterial  
425 symbionts but has little effect on life history in adult female citrus mealybugs. *Entomol. Exp. Appl.*  
426 **153**, 1–9. (doi:10.1111/eea.12222)
- 427 16. Evans JD, Spivak M. 2010 Socialized medicine: Individual and communal disease barriers in honey  
428 bees. *J. Invertebr. Pathol.* **103**, **Supplement**, S62–S72. (doi:10.1016/j.jip.2009.06.019)
- 429 17. Esch H. 1960 Über die Körpertemperaturen und den Wärmehaushalt von *Apis mellifica*. *Z. Für Vgl.*  
430 *Physiol.* **43**, 305–335. (doi:10.1007/BF00298066)
- 431 18. Heinrich B. 1974 Thermoregulation in endothermic insects. *Science* **185**, 747–756.  
432 (doi:10.1126/science.185.4153.747)
- 433 19. Heinrich B. 2004 *Bumblebee Economics: Revised Edition*. Cambridge, MA, United States: Harvard  
434 University Press.
- 435 20. Starks PT, Blackie CA, Seeley TD. In press. Fever in honeybee colonies. *Naturwissenschaften* **87**, 229–  
436 231. (doi:10.1007/s001140050709)
- 437 21. Di Prisco G, Zhang X, Pennacchio F, Caprio E, Li J, Evans JD, DeGrandi-Hoffman G, Hamilton M, Chen  
438 YP. 2011 Dynamics of Persistent and Acute Deformed Wing Virus Infections in Honey Bees, *Apis*  
439 *mellifera*. *Viruses* **3**, 2425–2441. (doi:10.3390/v3122425)
- 440 22. Garedew A, Schmolz E, Lamprecht I. 2003 Microcalorimetric and respirometric investigation of the  
441 effect of temperature on the antiviral action of the natural bee product-propolis. *Thermochim.*  
442 *Acta* **399**, 171–180. (doi:10.1016/S0040-6031(02)00453-7)
- 443 23. Martín-Hernández R, Meana A, García-Palencia P, Marín P, Botías C, Garrido-Bailón E, Barrios L,  
444 Higes M. 2009 Effect of temperature on the biotic potential of honeybee microsporidia. *Appl.*  
445 *Environ. Microbiol.* **75**, 2554–2557. (doi:10.1128/AEM.02908-08)
- 446 24. Raymann K, Moran NA. 2018 The role of the gut microbiome in health and disease of adult honey  
447 bee workers. *Curr. Opin. Insect Sci.* **26**, 97–104. (doi:10.1016/j.cois.2018.02.012)
- 448 25. Kwong WK, Medina LA, Koch H, Sing K-W, Soh EJY, Ascher JS, Jaffé R, Moran NA. 2017 Dynamic  
449 microbiome evolution in social bees. *Sci. Adv.* **3**, e1600513. (doi:10.1126/sciadv.1600513)

- 450 26. Koch H, Schmid-Hempel P. 2012 Gut microbiota instead of host genotype drive the specificity in the  
451 interaction of a natural host-parasite system. *Ecol. Lett.* **15**, 1095–1103. (doi:10.1111/j.1461-  
452 0248.2012.01831.x)
- 453 27. Billiet A, Meeus I, Van Nieuwerburgh F, Deforce D, Wäckers F, Smagghe G. 2017 Colony contact  
454 contributes to the diversity of gut bacteria in bumblebees (*Bombus terrestris*). *Insect Sci.* **24**, 270–  
455 277. (doi:10.1111/1744-7917.12284)
- 456 28. Mockler BK, Kwong WK, Moran NA, Koch H. 2018 Microbiome Structure Influences Infection by the  
457 Parasite *Crithidia bombi* in Bumble Bees. *Appl. Environ. Microbiol.* **84**, e02335-17.  
458 (doi:10.1128/AEM.02335-17)
- 459 29. Praet J, Parmentier A, Schmid-Hempel R, Meeus I, Smagghe G, Vandamme P. In press. Large-scale  
460 cultivation of the bumblebee gut microbiota reveals an underestimated bacterial species diversity  
461 capable of pathogen inhibition. *Environ. Microbiol.*, n/a-n/a. (doi:10.1111/1462-2920.13973)
- 462 30. Koch H, Cisarovsky G, Schmid-Hempel P. 2012 Ecological effects on gut bacterial communities in  
463 wild bumblebee colonies. *J. Anim. Ecol.* **81**, 1202–10. (doi:10.1111/j.1365-2656.2012.02004.x)
- 464 31. Engel P, James RR, Koga R, Kwong WK, McFrederick QS, Moran NA. 2013 Standard methods for  
465 research on *Apis mellifera* gut symbionts. *J. Apic. Res.* **52**, 1–24. (doi:10.3896/IBRA.1.52.4.07)
- 466 32. Kwong WK, Moran NA. 2013 Cultivation and characterization of the gut symbionts of honey bees  
467 and bumble bees: description of *Snodgrassella alvi* gen. nov., sp. nov., a member of the family  
468 Neisseriaceae of the Betaproteobacteria, and *Gilliamella apicola* gen. nov., sp. nov., a member of  
469 Orbaceae fam. nov., Orbales ord. nov., a sister taxon to the order ‘Enterobacteriales’ of the  
470 Gammaproteobacteria. *Int. J. Syst. Evol. Microbiol.* **63**, 2008–2018. (doi:10.1099/ijs.0.044875-0)
- 471 33. Salathé R, Tognazzo M, Schmid-Hempel R, Schmid-Hempel P. 2012 Probing mixed-genotype  
472 infections I: Extraction and cloning of infections from hosts of the trypanosomatid *Crithidia bombi*.  
473 *PLOS ONE* **7**, e49046. (doi:10.1371/journal.pone.0049046)
- 474 34. Schwarz RS, Bauchan GR, Murphy CA, Ravoet J, de Graaf DC, Evans JD. 2015 Characterization of Two  
475 Species of Trypanosomatidae from the Honey Bee *Apis mellifera*: *Crithidia mellificae* Langridge and  
476 McGhee, and *Lotmaria passim* n. gen., n. sp. *J. Eukaryot. Microbiol.* **62**, 567–583.  
477 (doi:10.1111/jeu.12209)
- 478 35. Gisder S, Möckel N, Linde A, Genersch E. 2011 A cell culture model for *Nosema ceranae* and *Nosema*  
479 *apis* allows new insights into the life cycle of these important honey bee-pathogenic microsporidia.  
480 *Environ. Microbiol.* **13**, 404–413. (doi:10.1111/j.1462-2920.2010.02346.x)
- 481 36. Schmid-Hempel R, Tognazzo M. 2010 Molecular divergence defines two distinct lineages of *Crithidia*  
482 *bombi* (Trypanosomatidae), parasites of bumblebees. *J. Eukaryot. Microbiol.* **57**, 337–45.  
483 (doi:10.1111/j.1550-7408.2010.00480.x)
- 484 37. Schmid-Hempel P. 2001 On the evolutionary ecology of host–parasite interactions: addressing the  
485 question with regard to bumblebees and their parasites. *Naturwissenschaften* **88**, 147–158.  
486 (doi:10.1007/s001140100222)

- 487 38. Brown MJF, Schmid-Hempel R, Schmid-Hempel P. 2003 Strong context-dependent virulence in a  
488 host–parasite system: reconciling genetic evidence with theory. *J. Anim. Ecol.* **72**, 994–1002.
- 489 39. Gegeer RJ, Otterstatter MC, Thomson JD. 2006 Bumble-bee foragers infected by a gut parasite have  
490 an impaired ability to utilize floral information. *Proc. Biol. Sci.* **273**, 1073–8.  
491 (doi:10.1098/rspb.2005.3423)
- 492 40. Imhoof B, Schmid-Hempel P. 1999 Colony success of the bumble bee, *Bombus terrestris*, in relation  
493 to infections by two protozoan parasites, *Crithidia bombi* and *Nosema bombi*. *Insectes Sociaux* **46**,  
494 233–238. (doi:10.1007/s000400050139)
- 495 41. Schmid-Hempel R *et al.* 2014 The invasion of southern South America by imported bumblebees and  
496 associated parasites. *J. Anim. Ecol.* **83**, 823–837. (doi:10.1111/1365-2656.12185)
- 497 42. Cornman RS, Tarpy DR, Chen Y, Jeffreys L, Lopez D, Pettis JS, vanEngelsdorp D, Evans JD. 2012  
498 Pathogen Webs in Collapsing Honey Bee Colonies. *PLOS ONE* **7**, e43562.  
499 (doi:10.1371/journal.pone.0043562)
- 500 43. Ravoet J, Maharramov J, Meeus I, De Smet L, Wenseleers T, Smagghe G, de Graaf DC. 2013  
501 Comprehensive bee pathogen screening in Belgium reveals *Crithidia mellifica* as a new  
502 contributory factor to winter mortality. *PLOS ONE* **8**, e72443.
- 503 44. Kešnerová L, Mars RAT, Ellegaard KM, Troilo M, Sauer U, Engel P. 2017 Disentangling metabolic  
504 functions of bacteria in the honey bee gut. *PLOS Biol.* **15**, e2003467.  
505 (doi:10.1371/journal.pbio.2003467)
- 506 45. Praet J, Meeus I, Cnockaert M, Houf K, Smagghe G, Vandamme P. 2015 Novel lactic acid bacteria  
507 isolated from the bumble bee gut: *Convivina intestini* gen. nov., sp. nov., *Lactobacillus bombicola* sp.  
508 nov., and *Weissella bombi* sp. nov. *Antonie Van Leeuwenhoek* **107**, 1337–1349.  
509 (doi:10.1007/s10482-015-0429-z)
- 510 46. Rohr JR, Dobson AP, Johnson PTJ, Kilpatrick AM, Paull SH, Raffel TR, Ruiz-Moreno D, Thomas MB.  
511 2011 Frontiers in climate change–disease research. *Trends Ecol. Evol.* **26**, 270–277.  
512 (doi:10.1016/j.tree.2011.03.002)
- 513 47. Palmer-Young EC, Sadd BM, Irwin RE, Adler LS. 2017 Synergistic effects of floral phytochemicals  
514 against a bumble bee parasite. *Ecol. Evol.* **7**, 1836–1849. (doi:10.1002/ece3.2794)
- 515 48. Palmer-Young EC, Sadd BM, Stevenson PC, Irwin RE, Adler LS. 2016 Bumble bee parasite strains vary  
516 in resistance to phytochemicals. *Sci. Rep.* **6**, 37087. (doi:10.1038/srep37087)
- 517 49. Kahm M, Hasenbrink G, Lichtenberg-Fraté H, Ludwig J, Kschischo M. 2010 grofit: fitting biological  
518 growth curves with R. *J. Stat. Softw.* **33**, 1–21.
- 519 50. Hasenbrink G, Kolacna L, Ludwig J, Sychrova H, Kschischo M, Lichtenberg-Fraté H. 2007 Ring test  
520 assessment of the mKir2.1 growth based assay in *Saccharomyces cerevisiae* using parametric  
521 models and model-free fits. *Appl. Microbiol. Biotechnol.* **73**, 1212–1221. (doi:10.1007/s00253-006-  
522 0589-x)

- 523 51. Padfield D, Yvon-Durocher G, Buckling A, Jennings S, Yvon-Durocher G. In press. Rapid evolution of  
524 metabolic traits explains thermal adaptation in phytoplankton. *Ecol. Lett.* **19**, 133–142.  
525 (doi:10.1111/ele.12545)
- 526 52. Schoolfield RM, Sharpe PJH, Magnuson CE. 1981 Non-linear regression of biological temperature-  
527 dependent rate models based on absolute reaction-rate theory. *J. Theor. Biol.* **88**, 719–731.  
528 (doi:10.1016/0022-5193(81)90246-0)
- 529 53. Padfield D, Matheson G. 2018 *R package nls.multstart: Robust Non-Linear Regression using AIC*  
530 *Scores*.
- 531 54. Heinrich B. 1972 Patterns of endothermy in bumblebee queens, drones and workers. *J. Comp.*  
532 *Physiol.* **77**, 65–79. (doi:10.1007/BF00696520)
- 533 55. Bates D, Mächler M, Bolker B, Walker S. 2015 Fitting linear mixed-effects models using lme4. *J. Stat.*  
534 *Softw.* **67**, 1–48. (doi:10.18637/jss.v067.i01)
- 535 56. Fox J, Weisberg S. 2011 *An R companion to applied regression*. Second Ed. Thousand Oaks CA: Sage.  
536 See <http://socserv.socsci.mcmaster.ca/jfox/Books/Companion>.
- 537 57. Lenth RV. 2016 Least-squares means: the R package lsmeans. *J. Stat. Softw.* **69**, 1–33.  
538 (doi:10.18637/jss.v069.i01)
- 539 58. Kosmidis I. 2013 *R package brglm: Bias reduction in binary-response Generalized Linear Models*. See  
540 <http://www.ucl.ac.uk/ucakiko/software.html>.
- 541 59. Imhoof B, Schmid-Hempel P. 1998 Single-clone and mixed-clone infections versus host environment  
542 in *Crithidia bombi* infecting bumblebees. *Parasitology* **117**, 331–336.
- 543 60. Barribeau SM, Sadd BM, du Plessis L, Schmid-Hempel P. 2014 Gene expression differences  
544 underlying genotype-by-genotype specificity in a host–parasite system. *Proc. Natl. Acad. Sci.* **111**,  
545 3496–3501. (doi:10.1073/pnas.1318628111)
- 546 61. Schmid-Hempel P, Pühr K, Krüger N, Reber C, Schmid-Hempel R. 1999 Dynamic and Genetic  
547 Consequences of Variation in Horizontal Transmission for a Microparasitic Infection. *Evolution* **53**,  
548 426–434. (doi:10.1111/j.1558-5646.1999.tb03778.x)
- 549 62. Marxer M, Vollenweider V, Schmid-Hempel P. 2016 Insect antimicrobial peptides act synergistically  
550 to inhibit a trypanosome parasite. *Phil Trans R Soc B* **371**, 20150302. (doi:10.1098/rstb.2015.0302)
- 551 63. Engel P, Martinson VG, Moran NA. 2012 Functional diversity within the simple gut microbiota of the  
552 honey bee. *Proc. Natl. Acad. Sci.* **109**, 11002–11007. (doi:10.1073/pnas.1202970109)
- 553 64. Zheng H, Powell JE, Steele MI, Dietrich C, Moran NA. 2017 Honeybee gut microbiota promotes host  
554 weight gain via bacterial metabolism and hormonal signaling. *Proc. Natl. Acad. Sci.* , 201701819.  
555 (doi:10.1073/pnas.1701819114)
- 556 65. Palmer-Young EC, Raffel TR, McFrederick QS. 2018 pH-mediated inhibition of a bumble bee parasite  
557 by an intestinal symbiont. *bioRxiv* , 336347. (doi:10.1101/336347)

- 558 66. Volterra V. 1928 Variations and Fluctuations of the Number of Individuals in Animal Species living  
559 together. *ICES J. Mar. Sci.* **3**, 3–51. (doi:10.1093/icesjms/3.1.3)
- 560 67. Powell JE, Martinson VG, Urban-Mead K, Moran NA. 2014 Routes of Acquisition of the Gut  
561 Microbiota of the Honey Bee *Apis mellifera*. *Appl. Environ. Microbiol.* **80**, 7378–7387.  
562 (doi:10.1128/AEM.01861-14)
- 563 68. Koch H, Schmid-Hempel P. 2011 Socially transmitted gut microbiota protect bumble bees against an  
564 intestinal parasite. *Proc. Natl. Acad. Sci. U. S. A.* **108**, 19288–19292. (doi:10.1073/pnas.1110474108)
- 565 69. McFrederick QS, Wcislo WT, Taylor DR, Ishak HD, Dowd SE, Mueller UG. 2012 Environment or kin:  
566 whence do bees obtain acidophilic bacteria? *Mol. Ecol.* **21**, 1754–1768. (doi:10.1111/j.1365-  
567 294X.2012.05496.x)
- 568 70. Xu J, James RR. 2012 Temperature stress affects the expression of immune response genes in the  
569 alfalfa leafcutting bee, *Megachile rotundata*. *Insect Mol. Biol.* **21**, 269–280. (doi:10.1111/j.1365-  
570 2583.2012.01133.x)
- 571 71. Voort M van der, Kempenaar M, Driel M van, Raaijmakers JM, Mendes R. In press. Impact of soil  
572 heat on reassembly of bacterial communities in the rhizosphere microbiome and plant disease  
573 suppression. *Ecol. Lett.* **19**, 375–382. (doi:10.1111/ele.12567)
- 574 72. Raymann K, Shaffer Z, Moran NA. 2017 Antibiotic exposure perturbs the gut microbiota and  
575 elevates mortality in honeybees. *PLOS Biol.* **15**, e2001861. (doi:10.1371/journal.pbio.2001861)
- 576 73. Rohr JR, Brown J, Battaglin WA, McMahon TA, Relyea RA. 2017 A pesticide paradox: fungicides  
577 indirectly increase fungal infections. *Ecol. Appl.* **27**, 2290–2302. (doi:10.1002/eap.1607)
- 578 74. Thomason CA, Mullen N, Belden LK, May M, Hawley DM. 2017 Resident Microbiome Disruption with  
579 Antibiotics Enhances Virulence of a Colonizing Pathogen. *Sci. Rep.* **7**, 16177. (doi:10.1038/s41598-  
580 017-16393-3)
- 581



582 **FIGURES**

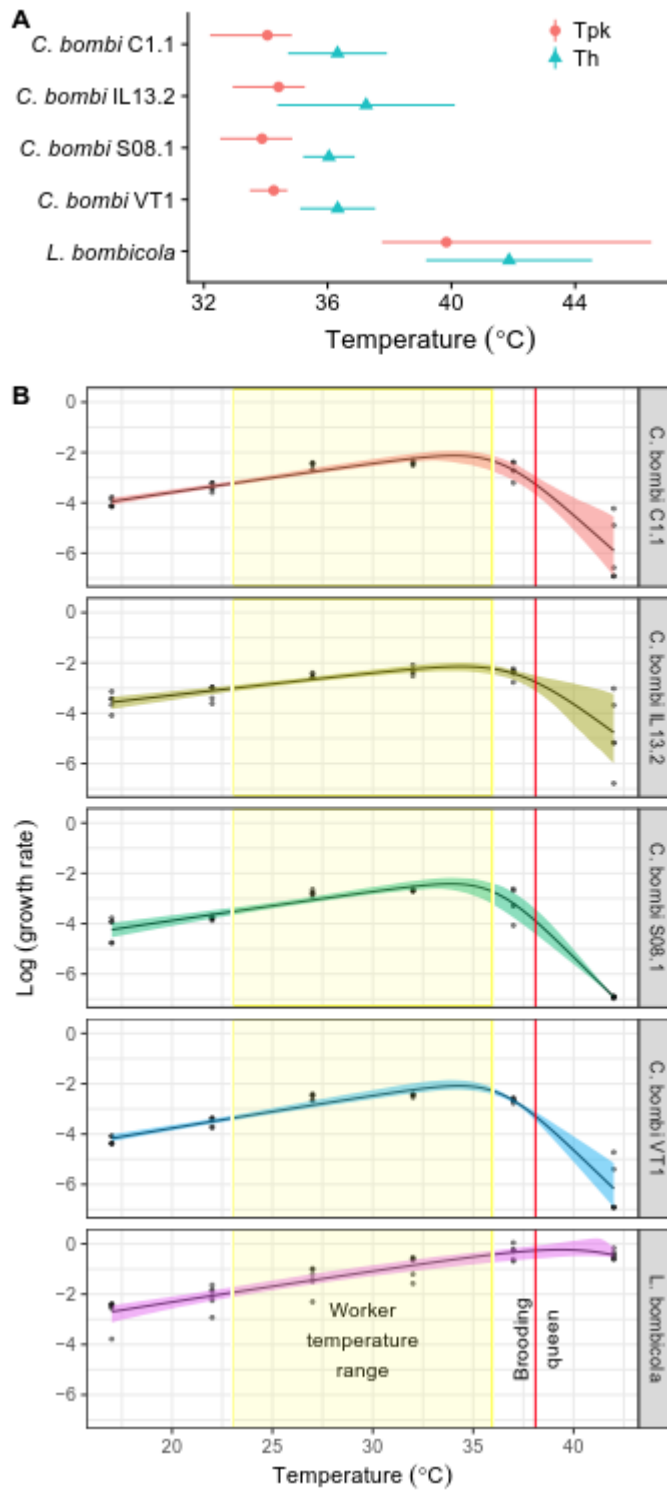

583

584 **Figure 1. *L. bombicola* exhibited higher peak growth temperature and greater tolerance to high**

585 **temperatures than did *C. bombi*. (A) Model parameters for four *C. bombi* strains and *L. bombicola*.**

586 Points and error bars show means and 95% confidence intervals for peak growth temperature ( $T_{pk}$ ,  
587 based on predictions from Sharpe-Schoolfield model from 999 bootstrap samples) and temperature at  
588 which growth was reduced by 50% relative to peak growth ( $T_h$ , based on Sharpe-Schoolfield model fit by  
589 nonlinear least squares). **(B)** Full thermal performance curves used to derive model parameters shown in  
590 (A). Y-axis shows log-transformed specific growth rate ( $\mu$  (h<sup>-1</sup>)) based on spline fits. Points show raw  
591 data, with one point per replicate (incubator). Trendlines show predictions from Sharpe-Schoolfield  
592 models. Shaded bands show 95% bootstrap confidence intervals. The curves are overlain with  
593 physiologically relevant temperature ranges for bumble bee workers (yellow vertical region) and queens  
594 (red vertical line), using data from [54]. Please refer to online version of article for color figure.  
595

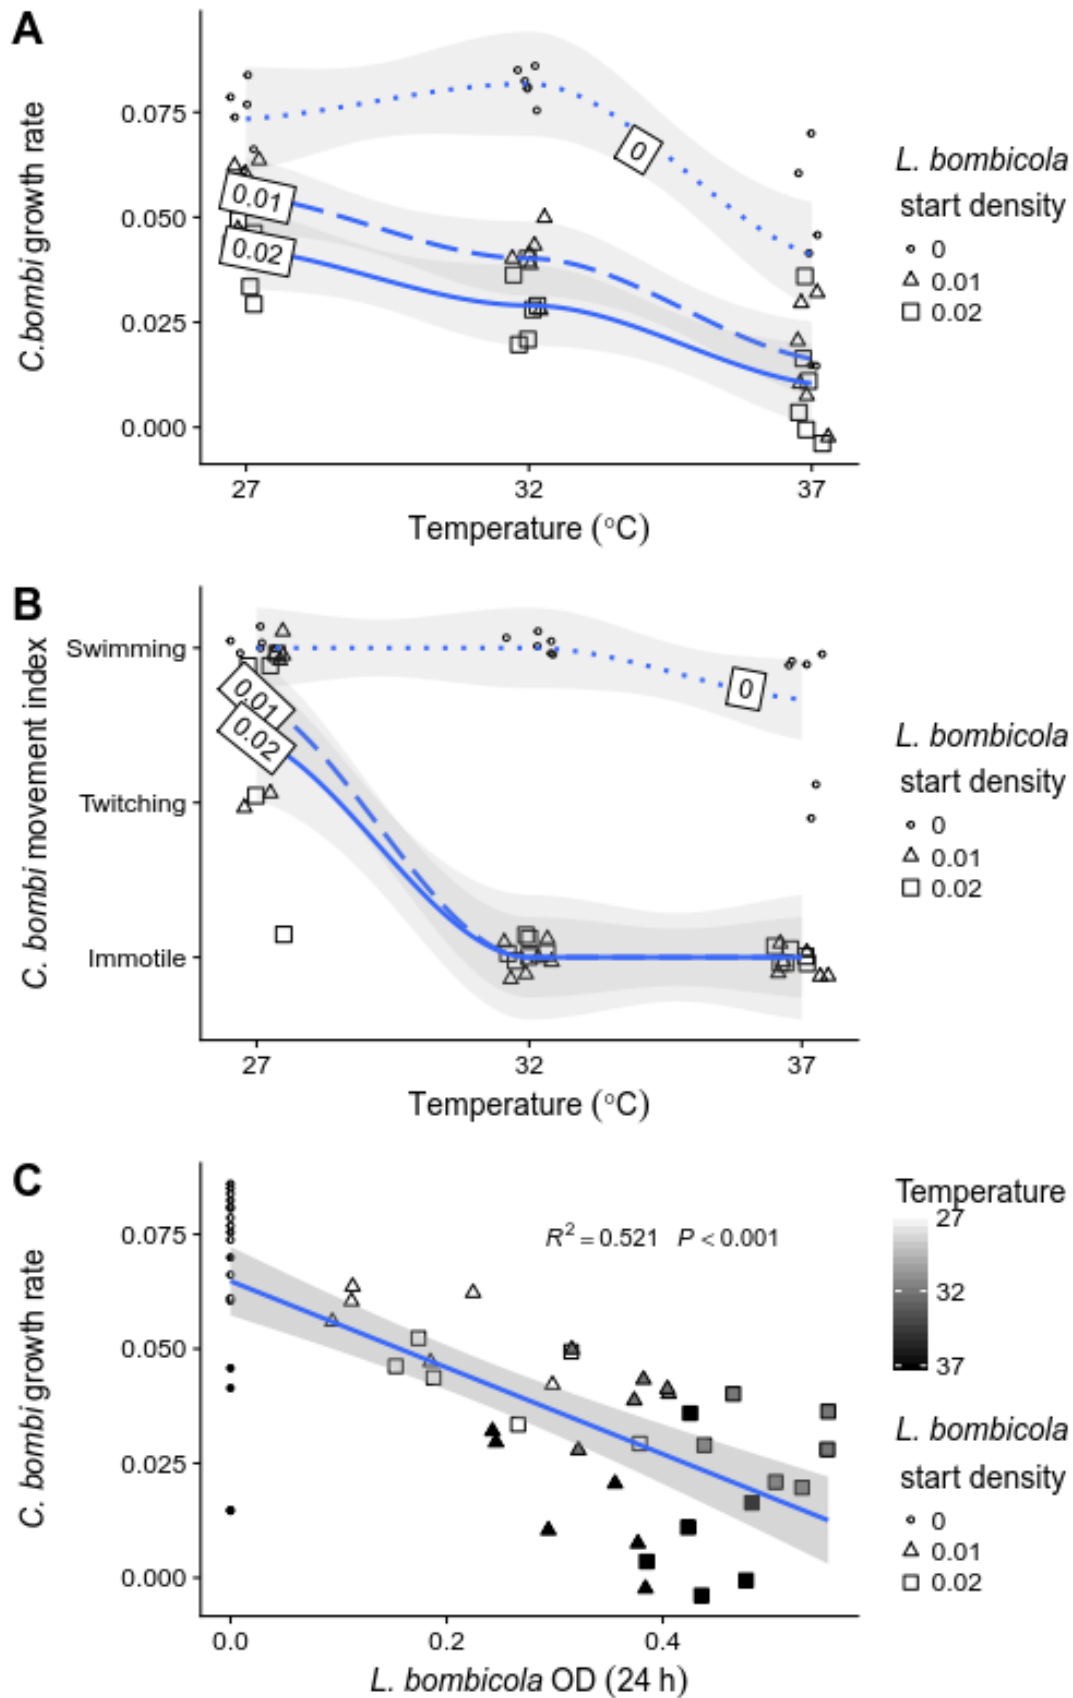

597 **Figure 2. Competition with *L. bombicola* inhibited growth of *C. bombi* and reduced peak growth**  
598 **temperature, due to higher *L. bombicola* growth rates at high temperatures. (A) *Crithidia bombi***  
599 **growth rate at 3 different temperatures in the presence of 3 starting optical densities (OD) of *L.***  
600 ***bombicola*: 0 (i.e., no *L. bombicola*, small hollow circles and dotted line), 0.01 (medium-sized triangles**  
601 **and dashed line), and 0.02 (large squares and solid line). Each point represents specific growth rate ( $\mu$**   
602 **(h<sup>-1</sup>)) based on cell counts for a single incubator and repetition of the experiment. Trendlines show**  
603 **smoothed Loess fits for each *L. bombicola* start density; shaded bands show 95% confidence intervals.**  
604 **Points have been randomly offset to reduce overplotting. (B) *Crithidia bombi* cell motility, observed**  
605 **microscopically after 24 h of coculture at the time of cell counts used to calculate growth rates in (A).**  
606 **Points have been randomly offset to reduce overplotting. Symbol size, symbol shape, and trendlines**  
607 **match interpretations for panel (A). No movement of *C. bombi* was observed for any of the *C. bombi***  
608 **cocultured with *L. bombicola* at 32 or 37°C. (C) *Crithidia bombi* growth rate was negatively correlated**  
609 **with OD of *L. bombicola* after 24 h of coculture. Partial OD of *L. bombicola* was estimated as net OD**  
610 **after subtraction of estimated OD due to *C. bombi*, based on correlation between OD and *C. bombi* cell**  
611 **concentration. Symbol fill indicates temperature; symbol shape and size indicate *L. bombicola* start**  
612 **density. Trendline shows linear model fit; shaded band shows 95% confidence interval.**  
613

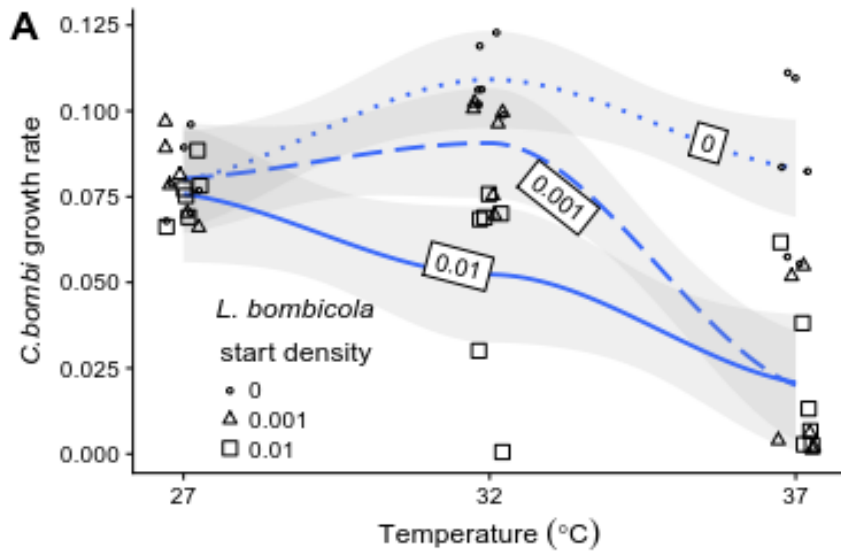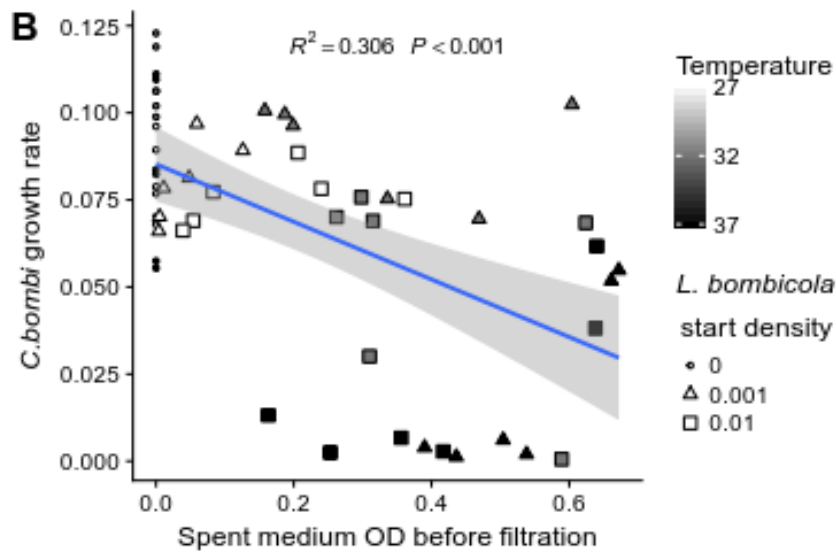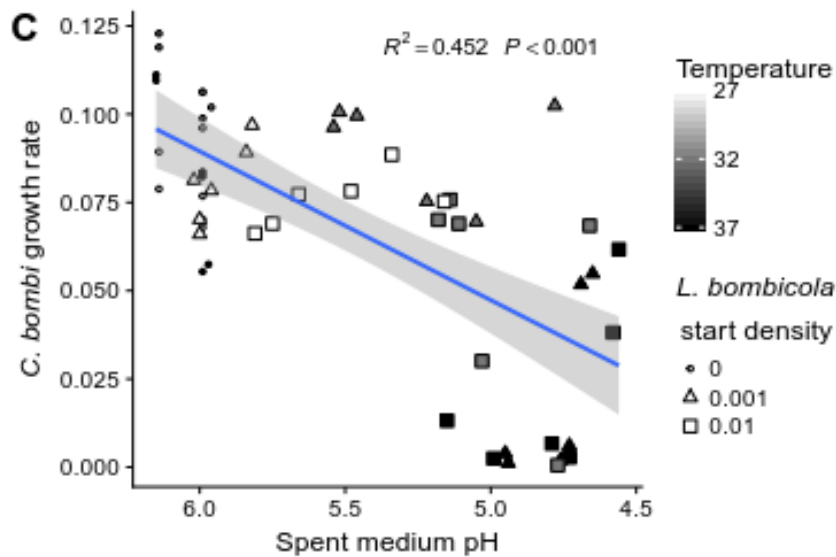

615 **Figure 3. Spent medium from *L. bombicola* reduced growth rate and peak growth temperature of *C.***  
616 ***bombi*, due to higher rates of *L. bombicola* growth and acid production at high temperatures. (A)**  
617 *Crithidia bombi* growth rate at 3 different temperatures in the presence of spent medium. Spent  
618 medium was generated by growth of *L. bombicola* for 24 h from 3 starting densities: OD = 0 (i.e., no *L.*  
619 *bombicola*, small hollow circles and dotted line), 0.001 (medium-sized gray circles and dashed line), and  
620 0.01 (large black circles and solid line). Each point represents specific growth rate ( $\mu$  (h<sup>-1</sup>)) based on cell  
621 counts for a single incubator and repetition of the experiment. Trendlines show smoothed Loess fits;  
622 shaded bands show 95% confidence intervals. **(B)** *Crithidia bombi* growth rate was negatively correlated  
623 with OD of *L. bombicola* at the time when spent medium was filtered (i.e., after 24 h incubation).  
624 Symbol fill indicates temperature; symbol shape and size indicate *L. bombicola* start density. Note higher  
625 OD's achieved at higher temperatures, except in the *L. bombicola*-free controls (start density = 0,  
626 circles). Growth of *C. bombi* was assayed at the same temperature at which the spent medium had been  
627 generated. Trendline shows linear model fit, pooled across start densities and temperatures. Shaded  
628 band shows 95% confidence interval. **(C)** Growth rate of *C. bombi* was negatively correlated with acidity  
629 of *L. bombicola* spent medium. X-axis shows pH of spent medium after 20 h growth of *L. bombicola*, at  
630 the beginning of the *C. bombi* growth assay. As in (B), symbol fill indicates incubation temperature,  
631 symbol shape and size indicate *L. bombicola* start density, and trendline with shaded band shows linear  
632 model fit with 95% confidence bands. Note higher acidity (lower pH) achieved at higher temperatures,  
633 except in the *L. bombicola*-free controls (start density = 0, circles).  
634

635

636 **MEDIA PROMOTION**

637 Many animals use elevated body temperature (fever) and beneficial gut bacteria to combat infection.

638 However, effects of high temperatures on competition between beneficial and pathogenic microbes

639 remain unknown. We tested effects of temperature on competition between a gut pathogen and a

640 symbiont of bumble bees—insects threatened by disease, but capable of elevating their nest and body

641 temperatures. An increase in temperature over the range found in bee colonies favored beneficial

642 bacteria over pathogens. This suggests that high body temperatures might reduce infection by clearing

643 pathogens while sparing beneficial bacteria, highlighting an unexplored mechanism by which fevers

644 could ameliorate disease.

645

1           Supplementary information for:  
2    Temperature-mediated inhibition of a  
3    bumble bee parasite by an intestinal  
4    symbiont  
5

6           Running title: Temperature mediates inhibition of bee parasite

7

8           Evan C Palmer-Young <sup>1\*</sup>, Thomas R Raffel <sup>2</sup>, Quinn S McFrederick <sup>1</sup>

9

10           <sup>1</sup> Department of Entomology, University of California Riverside, Riverside, CA, USA

11           <sup>2</sup> Department of Biology, Oakland University, Rochester, MI, USA

12           \*Corresponding author: [eCP52@cornell.edu](mailto:eCP52@cornell.edu)

13

14



15 **SUPPLEMENTARY FIGURES**

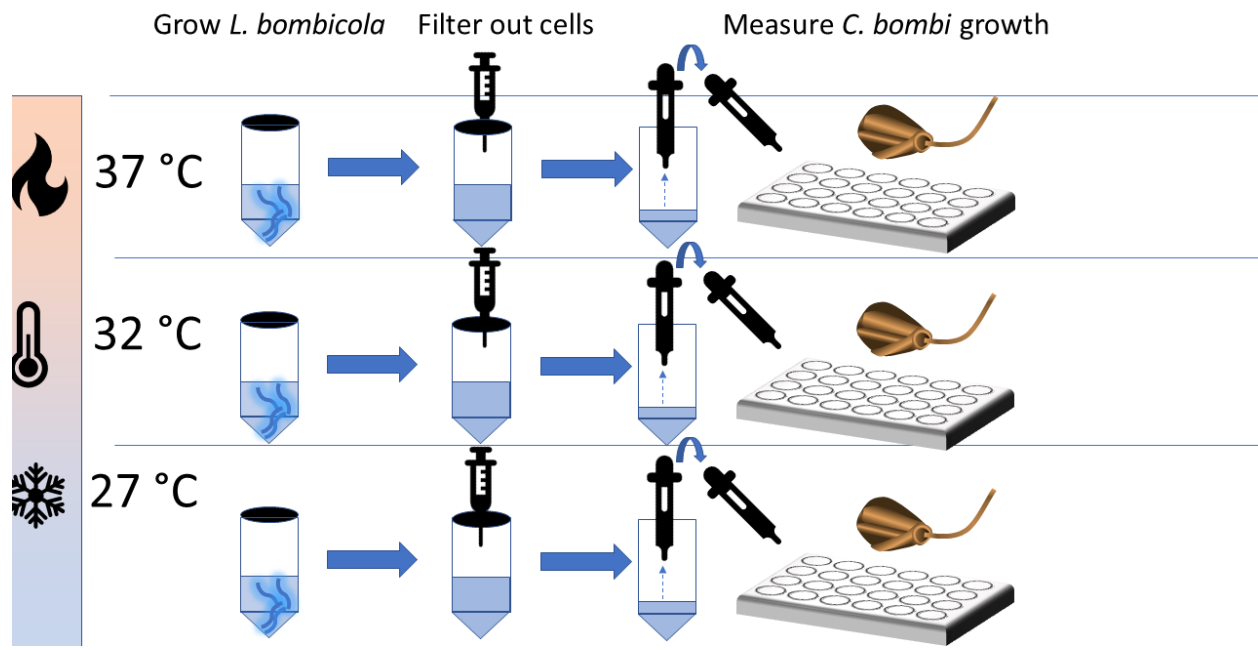

16

17 **Supplementary Figure 1. Schematic of Spent Medium Experiment.** To generate spent medium, *L.*  
18 *bombicola* was grown for 20 h in screw-cap conical tubes at one of three temperatures (27, 32, or 37 °C).  
19 At the end of the incubation period, the resulting medium was sterile-filtered to yield the MRSC-based  
20 spent medium, which was used immediately for assays of *C. bombi* growth. The temperature of the *C.*  
21 *bombi* growth assay matched the temperature at which the spent medium had been generated. The  
22 entire experiment was repeated three times, each time using two incubators for each of the three  
23 temperatures.

24

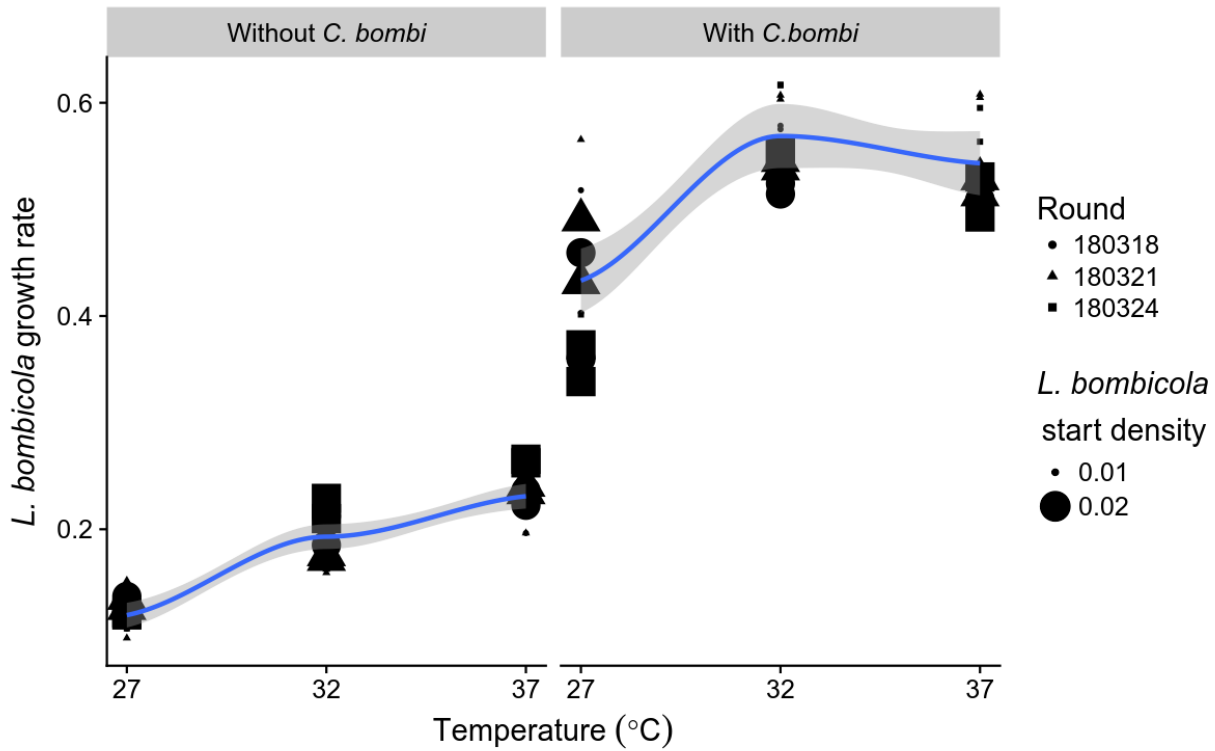

25

26 **Supplementary Figure 2. Estimated *L. bombicola* growth rates were higher in the presence of *C. bombi***

27 **than in its absence.** Left panel, *L. bombicola* monocultures without *C. bombi*. Right panel, cocultures

28 with *C. bombi* start density of OD = 0.010. Shapes represent different repetitions of the experiment,

29 each with 2 incubators per incubation temperature. Symbol size represents *L. bombicola* start density.

30

31 **SUPPLEMENTARY TABLES**

32 **Supplementary Table 1. Parameter estimates and confidence intervals for thermal performance**

33 **curves.** Tpk was estimated by bootstrapping, and has no associated standard error because it is not an

34 explicit model parameter. Temperatures (Th and Tpk) are given in Kelvin.

| Strain                 | term | estimate | std.error | conf.low | conf.high |
|------------------------|------|----------|-----------|----------|-----------|
| <i>L. bombicola</i>    | Inc  | -2.314   | 0.105     | -2.528   | -2.100    |
| <i>L. bombicola</i>    | E    | 0.941    | 0.123     | 0.690    | 1.191     |
| <i>L. bombicola</i>    | Eh   | 4.645    | 6.866     | -9.340   | 18.630    |
| <i>L. bombicola</i>    | Th   | 315.015  | 1.316     | 312.334  | 317.696   |
| <i>C. bombi</i> C1.1   | Inc  | -3.585   | 0.154     | -3.901   | -3.269    |
| <i>C. bombi</i> C1.1   | E    | 0.881    | 0.169     | 0.533    | 1.230     |
| <i>C. bombi</i> C1.1   | Eh   | 7.014    | 0.774     | 5.424    | 8.604     |
| <i>C. bombi</i> C1.1   | Th   | 309.469  | 0.778     | 307.870  | 311.068   |
| <i>C. bombi</i> IL13.2 | Inc  | -3.284   | 0.177     | -3.649   | -2.920    |
| <i>C. bombi</i> IL13.2 | E    | 0.680    | 0.199     | 0.271    | 1.090     |
| <i>C. bombi</i> IL13.2 | Eh   | 5.897    | 1.275     | 3.276    | 8.518     |
| <i>C. bombi</i> IL13.2 | Th   | 310.394  | 1.395     | 307.527  | 313.261   |
| <i>C. bombi</i> S08.1  | Inc  | -3.877   | 0.097     | -4.076   | -3.678    |
| <i>C. bombi</i> S08.1  | E    | 0.883    | 0.106     | 0.665    | 1.100     |
| <i>C. bombi</i> S08.1  | Eh   | 7.718    | 0.447     | 6.799    | 8.636     |
| <i>C. bombi</i> S08.1  | Th   | 309.195  | 0.405     | 308.362  | 310.027   |
| <i>C. bombi</i> VT1    | Inc  | -3.766   | 0.131     | -4.035   | -3.498    |
| <i>C. bombi</i> VT1    | E    | 0.991    | 0.142     | 0.698    | 1.284     |
| <i>C. bombi</i> VT1    | Eh   | 7.602    | 0.646     | 6.274    | 8.930     |
| <i>C. bombi</i> VT1    | Th   | 309.475  | 0.590     | 308.262  | 310.689   |
| <i>C. bombi</i> C1.1   | Tpk  | 307.202  | N/A       | 305.351  | 307.991   |
| <i>C. bombi</i> IL13.2 | Tpk  | 307.564  | N/A       | 306.082  | 308.415   |
| <i>C. bombi</i> S08.1  | Tpk  | 307.031  | N/A       | 305.677  | 308.007   |
| <i>C. bombi</i> VT1    | Tpk  | 307.408  | N/A       | 306.637  | 307.850   |
| <i>L. bombicola</i>    | Tpk  | 312.986  | N/A       | 310.907  | 319.610   |

35

36
